# Supplementary material for: Unicycler: Resolving bacterial genome assemblies from short and long sequencing reads
Source: PubMed Central journal article supplement (PMC5481147; doi:10.1371/journal.pcbi.1005595), 2017-06-08

*Klebsiella pneumoniae* INF125

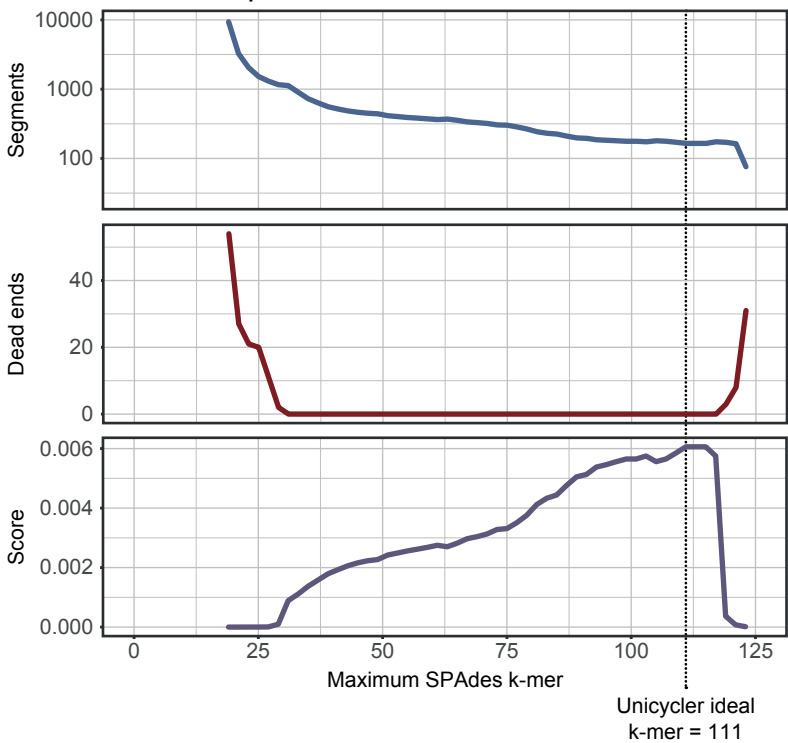

*Klebsiella pneumoniae* INF274

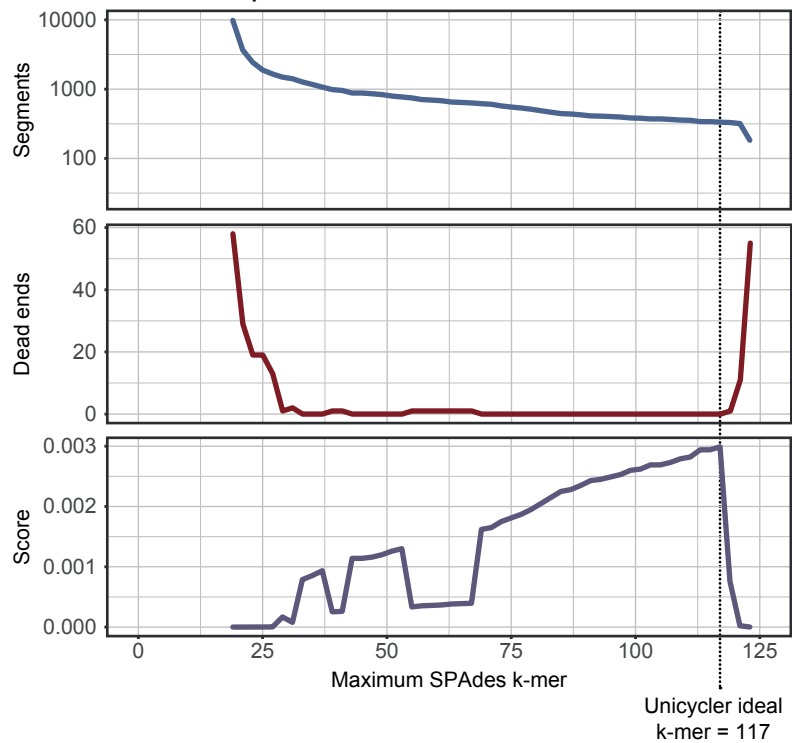

Supplement: pcbi.1005595.s001.pdf [file pcbi.1005595.s001.pdf]
