# Supplementary material for: Unicycler: Resolving bacterial genome assemblies from short and long sequencing reads
Source: PubMed Central journal article supplement (PMC5481147; doi:10.1371/journal.pcbi.1005595), 2017-06-08

# Semi-global read alignment in Unicycler-align

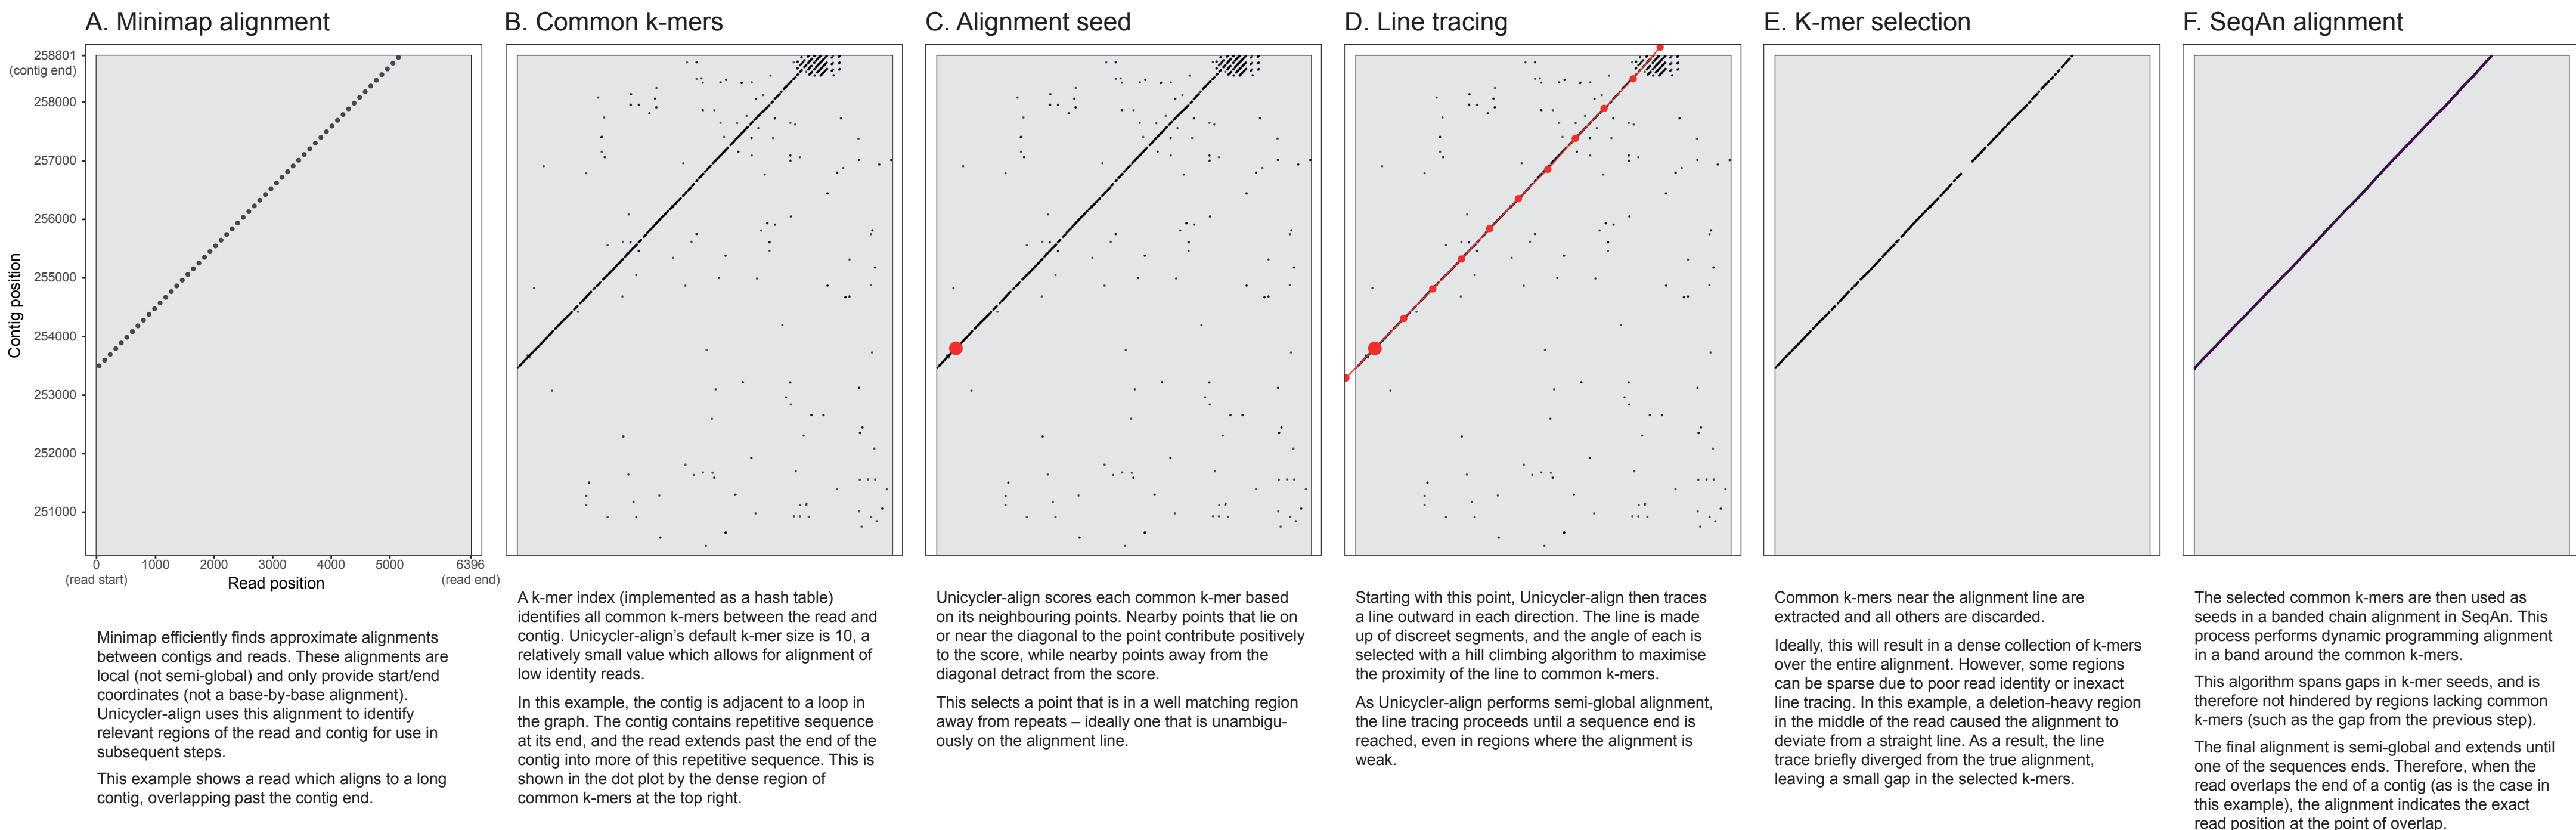

# Comparison of long-read alignment tools

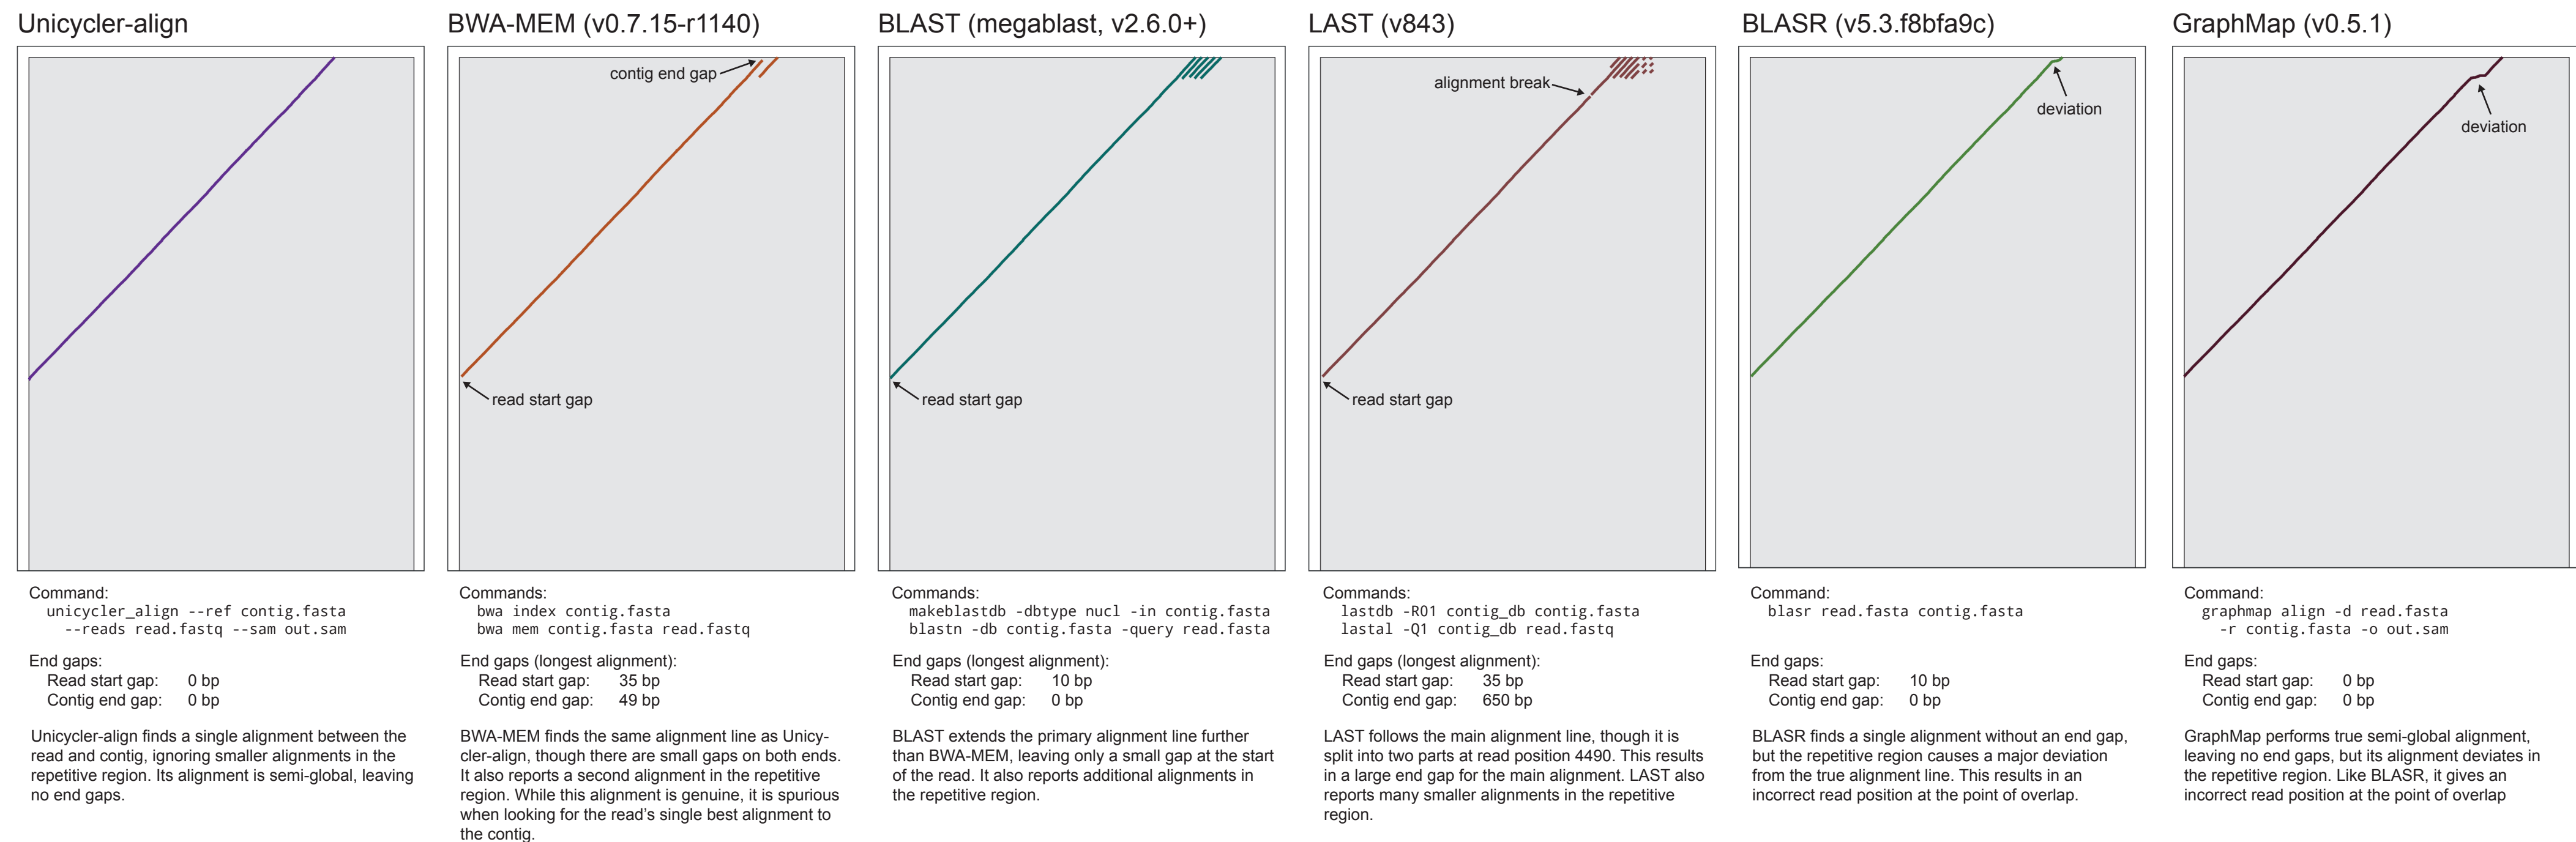

Supplement: pcbi.1005595.s003.pdf [file pcbi.1005595.s003.pdf]
