# Supplementary material for: Unicycler: Resolving bacterial genome assemblies from short and long sequencing reads
Source: PubMed Central journal article supplement (PMC5481147; doi:10.1371/journal.pcbi.1005595), 2017-06-08
Supplement: pcbi.1005595.s004.pdf [file pcbi.1005595.s004.pdf]

# Bridge types

# Score functions

### SPAdes contig bridge

Unicycler makes SPAdes contig bridges from paths in SPAdes' contigs.paths file. These bridges connect two single-copy contigs with the contigs in the path.

$$\text{score} = 100\sqrt{0.4dcl}$$

**Example**

SPAdes contig path: 13+, 2-, 24+, 13+, 5+, 18-

Bridge: 2→24→13→5

### Loop unrolling bridge

Loop unrolling bridges are a special case of SPAdes contig bridge for when a SPAdes contig path connects a single-copy contig to the middle contig of a loop. In such cases, Unicycler concludes that the loop is contiguous with the contig and uses the contig depths to determine the number of times to traverse the loop.

$$\text{score} = 100\sqrt{0.4d\omega}$$

**Example**

SPAdes contig path: 1+, 14+, 18-

Mean single-copy depth:  $\frac{1.0+1.1}{2} = 1.05$

Loop count by contig 14:  $\frac{2.9-1}{1.05} = 1.81$

Loop count by contig 18:  $\frac{2.2}{1.05} = 2.10$

Final loop count:  $\frac{1.81+2.10}{2} = 1.95$

Bridge: 1→14→18→14→18→14→3

### Long-read bridge with path

Unicycler finds long reads which connect two single-copy contigs and uses them to form a long-read bridge. It then searches for a graph path corresponding to the long-read consensus sequence. If a graph path is found, that sequence is used for the bridge instead of the long-read consensus sequence.

$$\text{score} = 100\sqrt{drgmns}$$

**Example**

Bridge: 1→41→25→21→31→36→7

### Long-read bridge without path

When Unicycler cannot find a graph path corresponding to a bridge's long-read consensus sequence (either due to poor homology or the absence of a path), it uses the consensus sequence directly.

This approach is less desirable, as the long-read consensus is likely to contain more errors than the short-read graph. However, it is necessary in cases when the short-read graph is incomplete and contains dead ends.

$$\text{score} = 100\sqrt{drgmne}$$

**Example**

Bridge: 1→read consensus→7

### Depth agreement: $d$

applies to all bridge types

$$d(x, y) = \frac{1}{1 + 10^2 \left( \log \left( \frac{\max\{x, y\}}{\min\{x, y\}} - 1 \right) + 0.45 \right)}$$

$x$  = contig 1 depth     $y$  = contig 2 depth

**Good case**  
Single-copy contigs have the same depth (1.8x).

**Bad case**  
Single-copy contigs have differing depths (1x vs 1.8x).

### Bridge length: $l$

applies to SPAdes contig bridges

$$l(h, p_\mu, p_\sigma) = \begin{cases} \frac{p_\sigma}{h - p_\mu + p_\sigma} & \text{if } h > p_\mu, \\ 1 & \text{otherwise} \end{cases}$$

$h$  = bridge length     $p_\mu$  = paired-end mean insert size  
 $p_\sigma$  = paired-end insert size standard deviation

**Good case**  
Bridge is shorter than the typical insert size.

**Bad case**  
Bridge is longer than the typical insert size.

### Read count: $r$

applies to all long-read bridges

$$r(n_{\text{actual}}, n_{\text{expected}}) = \min \left\{ 1, \frac{n_{\text{actual}}}{n_{\text{expected}}} \right\}$$

$n_{\text{actual}}$  = actual number of long reads in bridge  
 $n_{\text{expected}}$  = expected number of long reads in bridge

The  $r$  function penalises bridges with fewer than expected reads. The expected value assumes an even read distribution over the entire genome size.

**Good case**  
Expected number of reads support the bridge.

**Bad case**  
Fewer than expected number of reads support the bridge.

### Alignment length: $g$

applies to all long-read bridges

$$g(a_{\text{start}}, a_{\text{end}}, m) = 1 - \frac{4m}{4m + \min \{ \max \{ a_{\text{start}} \}, \max \{ a_{\text{end}} \} \}}$$

$a_{\text{start}}$  = set of alignment lengths to contig 1  
 $a_{\text{end}}$  = set of alignment lengths to contig 2  
 $m$  = minimum alignment length

Misalignments of long reads (i.e. long reads aligning to non-homologous contigs) are less likely with longer alignments. The  $g$  function rewards bridges with longer alignments and punishes bridges with shorter alignments.

**Good case**  
Long alignments to bridged contigs.

**Bad case**  
Short alignments to bridged contigs.

### Depth consistency: $c$

applies to SPAdes contig bridges

$$c(u, v, x, y, \text{path}) = \begin{cases} \prod_{k \text{ in path}} a(k_{\text{dep}}, z(u, v, x, y) k_{\text{count}}) & \text{if path is self-contained,} \\ 1 & \text{otherwise} \end{cases}$$

$$z(u, v, x, y) = x \frac{u}{u+v} + y \frac{v}{u+v} \quad a(i, j) = \frac{\min \{ i, j \}}{\max \{ i, j \}}$$

$u$  = contig 1 length     $v$  = contig 2 length     $x$  = contig 1 depth     $y$  = contig 2 depth  
 $k_{\text{dep}}$  = contig in path depth     $k_{\text{count}}$  = occurrences of contig in path

The  $c$  function quantifies the consistency of depth and count for contigs in the path. It only applies to self-contained paths, i.e. paths where all contigs lead exclusively to the single-copy contigs being bridged. In such cases, there should be a close agreement between contig depth and count, and this function penalises cases where the agreement is poor.

**Good case**  
Contig depths and path counts are consistent (e.g. 2x depth contigs are traversed twice).

**Bad case**  
Contig depths and path counts are inconsistent (e.g. 2x depth contigs are traversed three times).

### Whole loop number: $w$

applies to loop unrolling bridges

$$w(o) = \begin{cases} o & \text{if } o < 1, \\ 1 - 2(0.5 - |0.5 - o|) & \text{otherwise} \end{cases}$$

$o$  = loop count (not rounded)

This function penalises loop counts that are between two integers, as such cases may be the higher count (rounding up) or lower count (rounding down).

**Good case**  
Loop count is an integer.

**Bad case**  
Loop count is between integers.

### Contig alignment: $m$

applies to all long-read bridges

$$m(i_{\text{start}}, i_{\text{end}}) = \frac{\min \{ \max \{ i_{\text{start}} \}, \max \{ i_{\text{end}} \} \}}{100}$$

$i_{\text{start}}$  = set of alignment identities to contig 1  
 $i_{\text{end}}$  = set of alignment identities to contig 2

Misalignments of long reads (i.e. long reads aligning to non-homologous contigs) are less likely with high identity alignments. The  $m$  function rewards bridges with high-identity read alignments and punishes bridges with low-identity read alignments.

**Good case**  
High-identity alignments to bridged contigs.

**Bad case**  
Low-identity alignments to bridged contigs.

### Contig length: $n$

applies to all long-read bridges

$$n(l_{\text{start}}, l_{\text{end}}, m) = \min \left\{ \frac{4m}{4m + l_{\text{start}}}, \frac{4m}{4m + l_{\text{end}}} \right\}$$

$l_{\text{start}}$  = length of contig 1  
 $l_{\text{end}}$  = length of contig 2  
 $m$  = minimum alignment length

Short contigs are more likely to be falsely identified as single-copy (i.e. actually have a multiplicity > 1). The  $n$  function therefore rewards bridges between long contigs, as these are more likely to be bridges between genuinely single-copy contigs.

**Good case**  
Bridge connecting long contigs.

**Bad case**  
Bridge connecting short contigs.

### Loop count penalty: $q$

applies to loop unrolling bridges

$$q(o_{\text{rounded}}) = \frac{1}{2^{o_{\text{rounded}} - 1}}$$

$o_{\text{rounded}}$  = loop count (rounded to nearest integer)

Low loop counts are easier to distinguish due to a larger relative difference in depth (e.g. 1x vs 2x). High loop counts have a smaller relative difference in depth (e.g. 19x vs 20x) and are therefore harder to distinguish. This function penalises bridges with larger loop counts, as their exact count is less certain.

**Good case**  
Low loop count, easy to call.

**Bad case**  
High loop count, hard to call.

### Path alignment: $s$

applies to long-read bridges with path

$$s(c_{\text{actual}}, c_{\text{expected}}) = \frac{1}{1 + 2^{c_{\text{expected}} - c_{\text{actual}}}}$$

$c_{\text{actual}}$  = actual identity between long read consensus and bridge path  
 $c_{\text{expected}}$  = expected identity between long read consensus and bridge path

If a bridge's read consensus aligns poorly to the graph path, this suggests the graph path may not be homologous with the reads. The  $s$  function penalises bridges where the read consensus has a low alignment identity to the graph path.

**Good case**  
High identity between consensus and bridge path.

**Bad case**  
Low identity between consensus and bridge path.

### Dead ends: $e$

applies to long-read bridges without path

$$e(d) = \begin{cases} 1 & \text{if } d = 2, \\ 0.7 & \text{if } d = 1, \\ 0.2 & \text{otherwise} \end{cases}$$

$d$  = total number of dead ends at the end of contig 1 and the start of contig 2 (0, 1 or 2)

The  $e$  function penalises long-read bridges without paths if the bridge does not span contig dead ends. This discourages the use of a pathless long-read bridge when a true path exists.

**Good case**  
Pathless bridge connects two dead-end contigs.

**Bad case**  
Pathless bridge connects contigs without dead-ends.
