# Supplementary material for: Unicycler: Resolving bacterial genome assemblies from short and long sequencing reads
Source: PubMed Central journal article supplement (PMC5481147; doi:10.1371/journal.pcbi.1005595), 2017-06-08

**A. baumannii A1**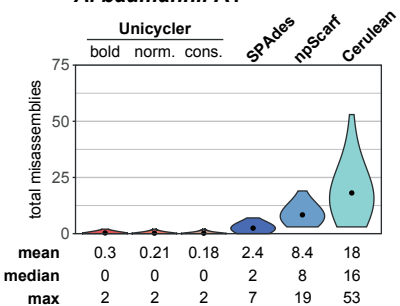**A. baumannii AB30**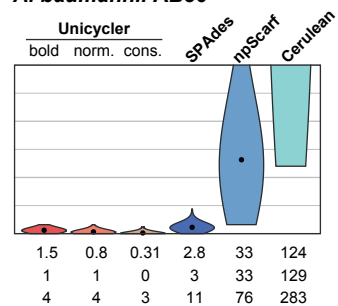**E. coli K-12 MG1655**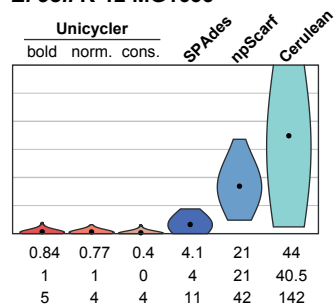**E. coli O25b H4-ST131**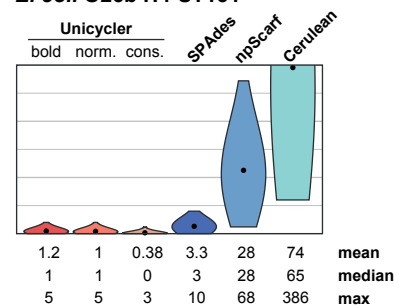**K. pneumoniae NJST258\_1**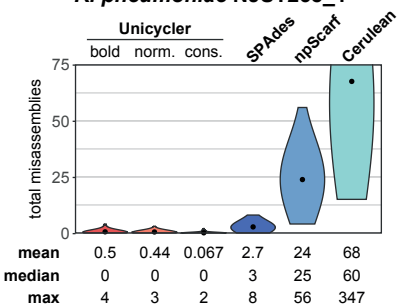**K. pneumoniae MGH 78578**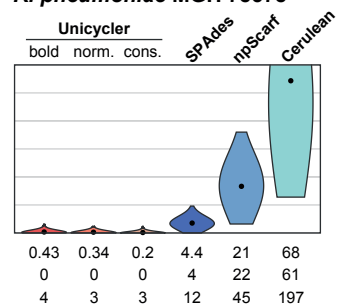**K. pneumoniae NTUH-K2044**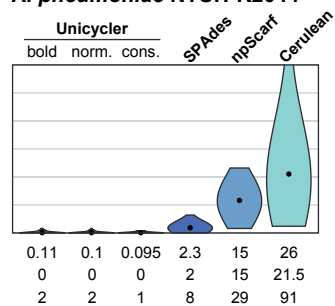**M. tuberculosis H37Rv**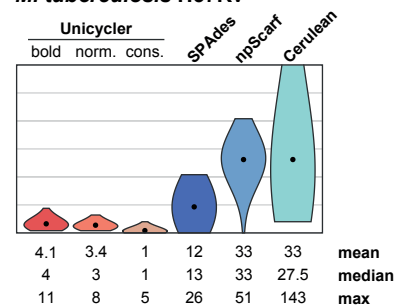**S. cerevisiae S288c**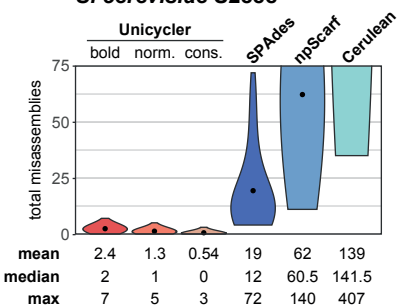**S. dysenteriae Sd197**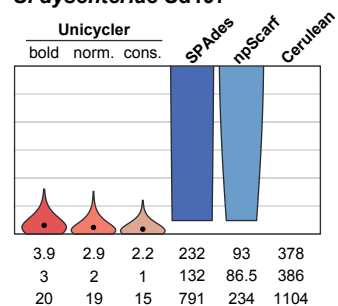**S. sonnei 53G**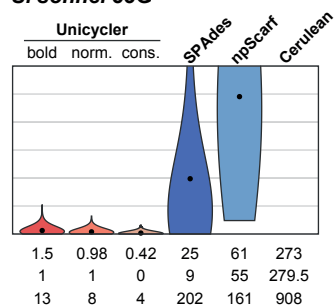**S. suis BM407**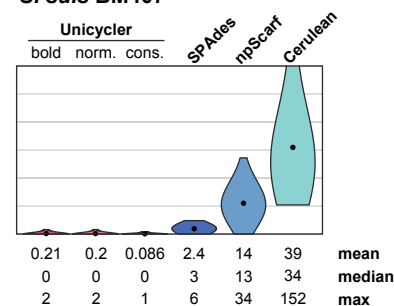

Supplement: pcbi.1005595.s005.pdf [file pcbi.1005595.s005.pdf]
