# Supplementary material for: Unicycler: Resolving bacterial genome assemblies from short and long sequencing reads
Source: PubMed Central journal article supplement (PMC5481147; doi:10.1371/journal.pcbi.1005595), 2017-06-08
Supplement: pcbi.1005595.s007.pdf [file pcbi.1005595.s007.pdf]

### Misassemblies

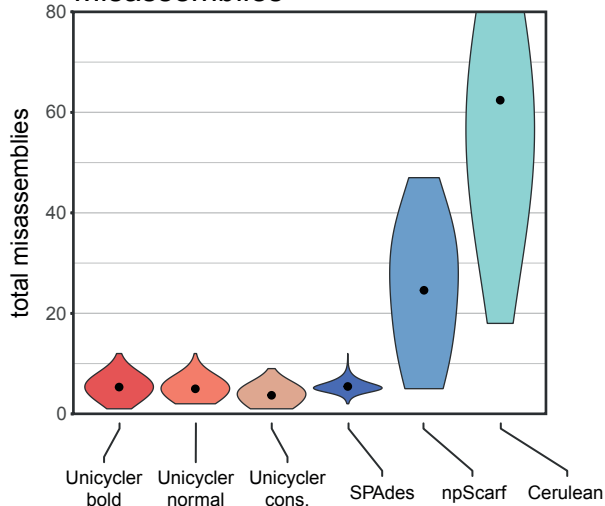

|          |     |     |     |     |    |     |
|----------|-----|-----|-----|-----|----|-----|
| mean:    | 5.3 | 5.0 | 3.7 | 5.4 | 25 | 62  |
| median:  | 5   | 5   | 4   | 5   | 26 | 58  |
| maximum: | 12  | 12  | 9   | 12  | 47 | 241 |

### Small errors

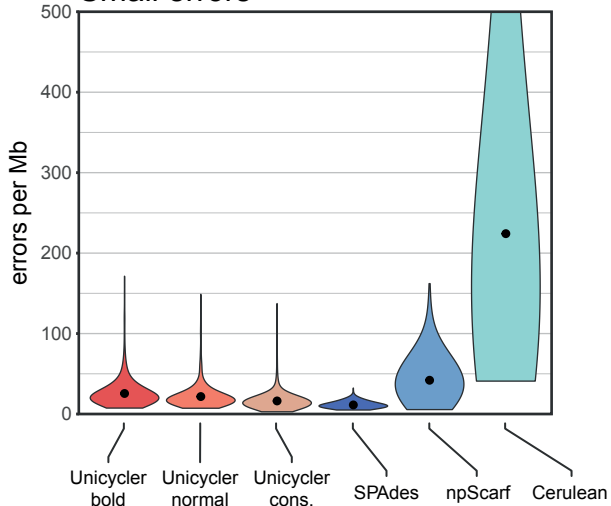

|          |     |     |     |    |     |     |
|----------|-----|-----|-----|----|-----|-----|
| mean:    | 26  | 22  | 16  | 11 | 42  | 224 |
| median:  | 21  | 18  | 14  | 10 | 40  | 175 |
| maximum: | 171 | 149 | 137 | 32 | 162 | 947 |
