# Supplementary material for: Unicycler: Resolving bacterial genome assemblies from short and long sequencing reads
Source: PubMed Central journal article supplement (PMC5481147; doi:10.1371/journal.pcbi.1005595), 2017-06-08

# All long-read sets

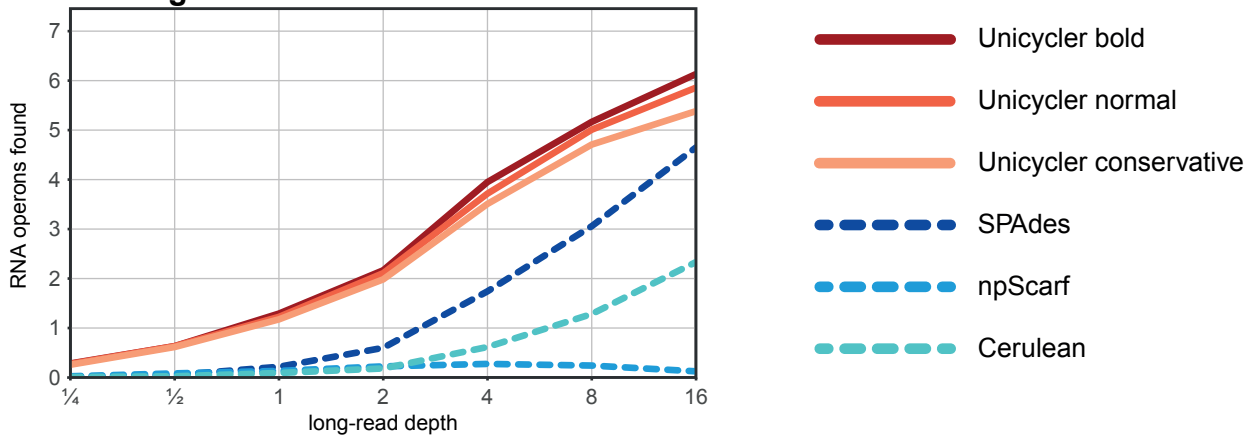

## Nanopore R7

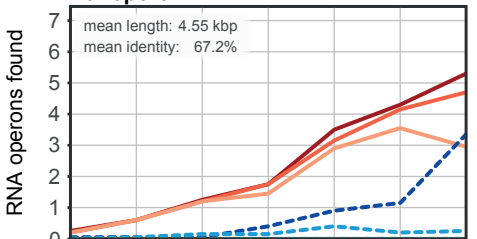

## Nanopore R9 (fail)

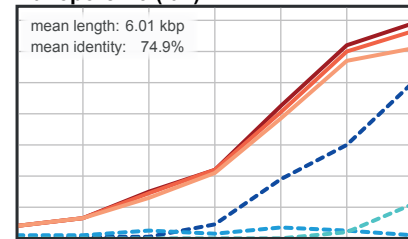

## Nanopore R9 (pass)

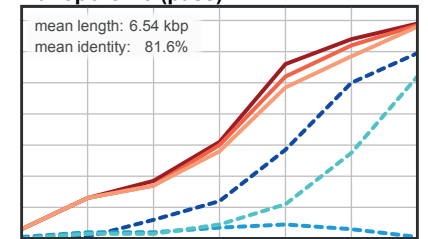

## PacBio RS, C2 chemistry

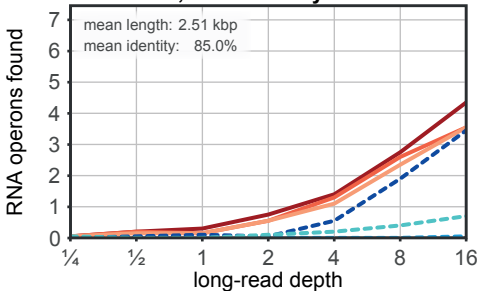

## PacBio RS II, C2 chemistry

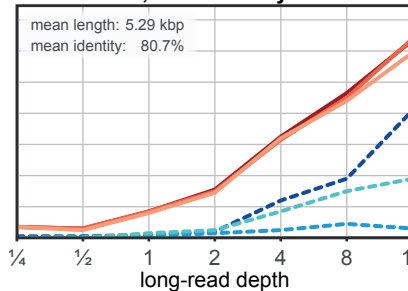

## PacBio RS II, C3 chemistry

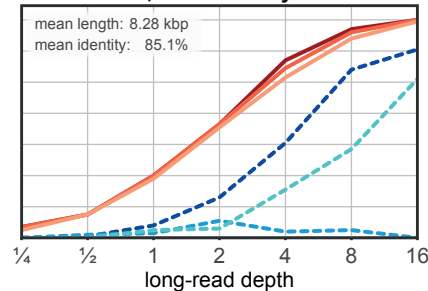

Supplement: pcbi.1005595.s008.pdf [file pcbi.1005595.s008.pdf]
