# Supplementary material for: Unicycler: Resolving bacterial genome assemblies from short and long sequencing reads
Source: PubMed Central journal article supplement (PMC5481147; doi:10.1371/journal.pcbi.1005595), 2017-06-08
Supplement: pcbi.1005595.s010.pdf [file pcbi.1005595.s010.pdf]

## Complete genome

contigs: 3  
dead ends: 0  
N50: 5,282,428 bp

This represents the ideal assembly outcome: one contig for each replicon in the bacterial genome. Since the genome has no dead ends, neither should the assembly graph.

It is usually not possible to produce a fully resolved assembly with only short paired-end reads because genomes often contain repeats larger than the sequenced fragments.

## Unicycler (before bridging)

contigs: 165  
dead ends: 0  
N50: 208,318 bp

Unicycler's unbridged graph is made from a high k-mer SPAdes assembly graph. Since the reads have good depth and coverage, this graph has no dead ends (all sequences are present).

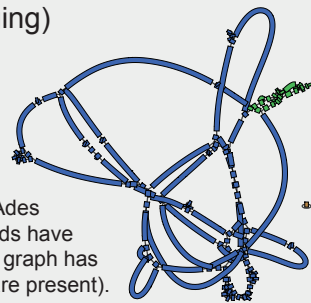

## Unicycler graph (after bridging)

contigs: 92  
dead ends: 0  
N50: 478,597 bp

After bridging with the SPAdes contig paths, the graph is sufficiently resolved to separate the large plasmid from the chromosome.

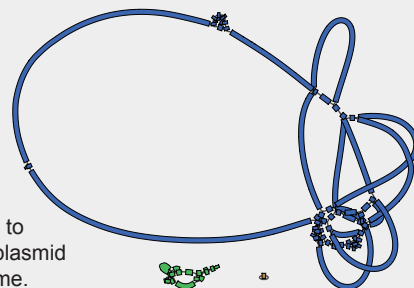

## SPAdes assembly graph

contigs: 382  
dead ends: 0  
N50: 93,344 bp

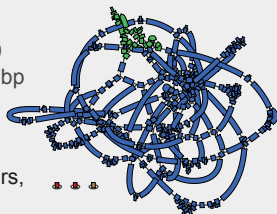

Due to smaller k-mers, the SPAdes assembly graph is less resolved than Unicycler's unbridged graph. It also contains erroneous contigs with sequence not in the genome.

## SPAdes contigs

contigs: 95  
dead ends: 190  
N50: 203,689 bp

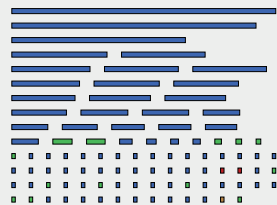

SPAdes contigs contain repeat resolution from read-pair orientation, but are no longer available in graph form. The chromosomal and plasmid contigs are interspersed.

## SPAdes scaffolds

contigs: 94  
dead ends: 188  
N50: 215,736 bp

SPAdes scaffolds are more resolved than its contigs, but some contain Ns.

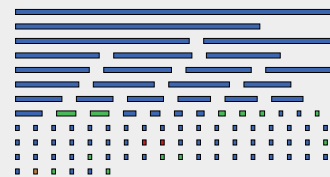

## ABYSS contigs

contigs: 146  
dead ends: 53  
N50: 258,741 bp

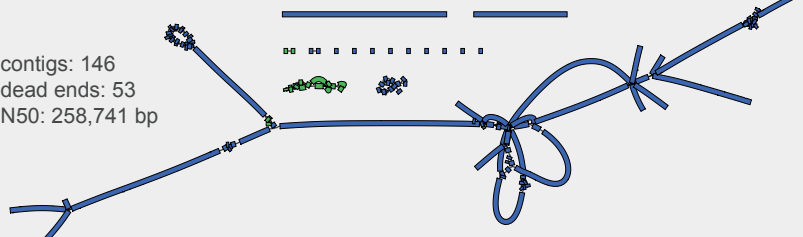

Unlike SPAdes, ABYSS contigs are available in graph form, though with many dead ends, fragmenting the graph into pieces.

## ABYSS scaffolds

contigs: 137  
dead ends: 42  
N50: 320,982 bp

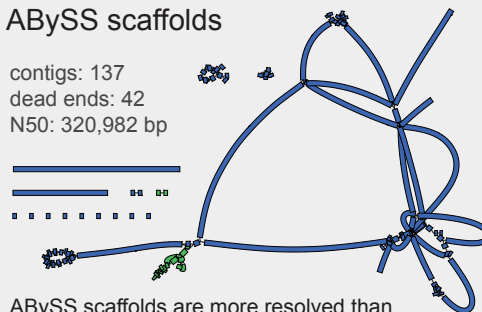

ABYSS scaffolds are more resolved than its contigs, but some contain Ns.
